# Supplementary material for: Association of Global DNA Methylation and Global DNA Hydroxymethylation with Metals and Other Exposures in Human Blood DNA Samples
Source: PubMed Central journal article supplement (PMC4154208; doi:10.1289/ehp.1306674), 2014-04-25
Supplement: ehp.1306674.s001.pdf [file ehp.1306674.s001.pdf]

## Supplemental Material

# Association of Global DNA Methylation and Global DNA Hydroxymethylation with Metals and other Exposures in Human Blood DNA Samples

Maria Tellez-Plaza, Wan-ye Tang, Yan Shang, Jason G. Umans, Kevin A. Francesconi, Walter Goessler, Marta Ledesma, Montserrat Leon, Martin Laclaustra, Jonathan Pollak, Eliseo Guallar, Shelley A. Cole, M. Dani Fallin, and Ana Navas-Acien

| <b>Table of Contents</b>                                                                                                                                                                                                                                                      | <b>Page</b> |
|-------------------------------------------------------------------------------------------------------------------------------------------------------------------------------------------------------------------------------------------------------------------------------|-------------|
| <b>Table S1.</b> Intra-assay coefficient of variation (CV) and intra-class correlation (ICC) for the technical replicates in the Strong Heart Study (SHS) (Lee et al. 1990; North et al. 2003) and Aragon Workers Health Study (AWHS) (Casasnovas et al. 2012) samples        | <b>2</b>    |
| <b>Table S2.</b> Distribution of white blood cell counts in the SHS (Lee et al. 1990; North et al. 2003) blood samples (visit 3)                                                                                                                                              | <b>3</b>    |
| <b>Table S3.</b> Median (interquartile range) of global DNA methylation (% of 5-mC) and global DNA hydroxymethylation (% of 5-hmC) in the SHS (Lee et al. 1990; North et al. 2003) in 1989-1991 (visit 1) and 1993-1995 (visit 3) <sup>a</sup> by participant characteristics | <b>4</b>    |
| <b>Figure S1.</b> Relationship of global DNA methylation (% 5-mC) and participant characteristics in the SHS (Lee et al. 1990; North et al. 2003) in 1989-1991 (visit 1) and 1998-1999 (visit 3)                                                                              | <b>6</b>    |
| <b>Figure S2.</b> Relationship of global DNA hydroxymethylation (% 5-hmC) and participant characteristics in the SHS (Lee et al. 1990; North et al. 2003) in 1989-1991 (visit 1) and 1998-1999 (visit 3)                                                                      | <b>7</b>    |
| <b>Figure S3.</b> Relationship of global DNA methylation (% 5-mC) and global DNA hydroxymethylation (% 5-hmC,) in blood collected in 2010, Aragon Workers Health Study (Casasnovas et al. 2012)                                                                               | <b>8</b>    |
| <b>References</b>                                                                                                                                                                                                                                                             | <b>9</b>    |

**Table S1.** Intra-assay coefficient of variation (CV) and intra-class correlation (ICC) for the technical replicates in the Strong Heart Study (SHS) (Lee et al. 1990; North et al. 2003) and Aragon Workers Health Study (AWHS) (Casasnovas et al. 2012) samples.

| Visit                              | 5-mC assay: replicates | 5-mC assay: median CV (IQR) | 5-mC assay: ICC | 5-hmC assay: replicates | 5-hmC assay: median CV (IQR) | 5-hmC assay: ICC |
|------------------------------------|------------------------|-----------------------------|-----------------|-------------------------|------------------------------|------------------|
| <b>Strong Heart Study</b>          |                        |                             |                 |                         |                              |                  |
| Visit 1, N=48                      | 3                      | 0.25% (0.10%, 0.51%)        | 0.9999          | 3                       | 0.37% (0.20%, 0.69%)         | 0.9993           |
| Visit 3, N=48                      | 3                      | 0.26% (0.08%, 0.58%)        | 0.9998          | 3                       | 0.31% (0.16%, 1.35%)         | 0.9985*          |
| <b>Aragon Workers Health Study</b> |                        |                             |                 |                         |                              |                  |
| N=48                               | 3                      | 3.14% (3.05%, 3.20%)        | 0.860           | 2                       | 2.80% (1.40%, 4.30%)         | 0.614            |

\*One individual with and outlier observance reading equal to zero excluded.

**Table S2.** Distribution of white blood cell counts in the SHS (Lee et al. 1990; North et al. 2003) blood samples (visit 3).

| <b>Counts</b>                                         | <b>N</b> | <b>Median (IQR)</b> |
|-------------------------------------------------------|----------|---------------------|
| Total white blood cells (units x 10 <sup>3</sup> /uL) | 44       | 6.25 (5.40, 7.35)   |
| Neutrophils (units x 10 <sup>3</sup> /uL)             | 44       | 3.65 (3.25, 4.58)   |
| Lymphocyte (units x 10 <sup>3</sup> /uL)              | 44       | 1.65 (1.45, 2.07)   |
| Monocyte (units x 10 <sup>3</sup> /uL)                | 44       | 0.36 (0.28, 0.49)   |
| Eosinophils (units x 10 <sup>3</sup> /uL)             | 39       | 0.20 (0.13, 0.29)   |
| Basophil (units x 10 <sup>3</sup> /uL)                | 44       | 0.05 (0.03, 0.12)   |

Information on blood cell counts in visit 3 was only available for 44 participants, among them only 39 participants had information on eosinophil count.

**Table S3.** Median (interquartile range) of global DNA methylation (% of 5-mC) and global DNA hydroxymethylation (% of 5-hmC) in the SHS (Lee et al. 1990; North et al. 2003) in 1989-1991 (visit 1) and 1993-1995 (visit 3)<sup>a</sup> by participant characteristics.

| Characteristics                            | N  | Methylation, Visit 1 | Methylation, Visit 3 | Hydroxymethylation, Visit 1 | Hydroxymethylation, Visit 3 |
|--------------------------------------------|----|----------------------|----------------------|-----------------------------|-----------------------------|
| <b>Overall</b>                             | 48 | 0.32 (0.15, 0.58)    | 0.32 (0.13, 0.55)    | 0.12 (0.07, 0.17)           | 0.15 (0.09, 0.25)           |
| <b>Age, years</b>                          |    |                      |                      |                             |                             |
| <54                                        | 24 | 0.34 (0.23, 0.60)    | 0.36 (0.27, 0.60)    | 0.13 (0.08, 0.19)           | 0.15 (0.09, 0.28)           |
| ≥54                                        | 24 | 0.31 (0.12, 0.54)    | 0.22 (0.10, 0.45)    | 0.12 (0.05, 0.15)           | 0.13 (0.07, 0.19)           |
| <b>Sex</b>                                 |    |                      |                      |                             |                             |
| Male                                       | 15 | 0.35 (0.12, 0.51)    | 0.33 (0.20, 0.67)    | 0.12 (0.07, 0.14)           | 0.13 (0.09, 0.19)           |
| Female                                     | 33 | 0.32 (0.17, 0.68)    | 0.32 (0.11, 0.46)    | 0.13 (0.07, 0.18)           | 0.16 (0.09, 0.28)           |
| <b>Education, years</b>                    |    |                      |                      |                             |                             |
| ≥12                                        | 29 | 0.28 (0.13, 0.53)    | 0.32 (0.16, 0.42)    | 0.13 (0.08, 0.19)           | 0.12 (0.08, 0.19)           |
| <12                                        | 19 | 0.39 (0.24, 0.61)    | 0.35 (0.10, 0.58)    | 0.09 (0.05, 0.15)           | 0.17 (0.11, 0.23)           |
| <b>BMI, kg/m<sup>b</sup></b>               |    |                      |                      |                             |                             |
| <30                                        | 20 | 0.26 (0.13, 0.49)    | 0.21 (0.09, 0.37)    | 0.12 (0.08, 0.17)           | 0.14 (0.09, 0.22)           |
| ≥30                                        | 27 | 0.35 (0.18, 0.62)    | 0.37 (0.24, 0.62)    | 0.13 (0.07, 0.18)           | 0.16 (0.09, 0.26)           |
| <b>Waist circumference, cm<sup>b</sup></b> |    |                      |                      |                             |                             |
| <Sex-specific median                       | 20 | 0.34 (0.17, 0.60)    | 0.27 (0.11, 0.55)    | 0.12 (0.07, 0.15)           | 0.16 (0.08, 0.26)           |
| ≥Sex-specific median                       | 26 | 0.32 (0.13, 0.58)    | 0.33 (0.16, 0.57)    | 0.13 (0.08, 0.18)           | 0.14 (0.09, 0.19)           |
| <b>% Body fat<sup>b</sup></b>              |    |                      |                      |                             |                             |
| <Sex-specific median                       | 23 | 0.32 (0.16, 0.61)    | 0.28 (0.10, 0.47)    | 0.10 (0.05, 0.16)           | 0.13 (0.06, 0.23)           |
| ≥Sex-specific median                       | 24 | 0.31 (0.13, 0.51)    | 0.35 (0.20, 0.69)    | 0.13 (0.09, 0.18)           | 0.16 (0.10, 0.27)           |
| <b>Smoking</b>                             |    |                      |                      |                             |                             |
| Never                                      | 20 | 0.32 (0.18, 0.58)    | 0.41 (0.26, 0.63)    | 0.12 (0.08, 0.15)           | 0.17 (0.12, 0.26)           |
| Ever                                       | 28 | 0.33 (0.12, 0.58)    | 0.25 (0.13, 0.38)    | 0.12 (0.06, 0.17)           | 0.12 (0.07, 0.23)           |
| <b>Alcohol status</b>                      |    |                      |                      |                             |                             |
| Never                                      | 8  | 0.39 (0.12, 0.72)    | 0.36 (0.10, 0.54)    | 0.16 (0.08, 0.21)           | 0.13 (0.10, 0.16)           |
| Ever                                       | 40 | 0.32 (0.16, 0.56)    | 0.32 (0.15, 0.58)    | 0.12 (0.07, 0.16)           | 0.15 (0.08, 0.27)           |
| <b>Urine arsenic µg/g<sup>c</sup></b>      |    |                      |                      |                             |                             |
| <7.2                                       | 24 | 0.33 (0.13, 0.58)    | 0.34 (0.23, 0.62)    | 0.13 (0.06, 0.23)           | 0.16 (0.09, 0.25)           |
| ≥14.0                                      | 24 | 0.32 (0.18, 0.57)    | 0.30 (0.09, 0.42)    | 0.12 (0.08, 0.15)           | 0.14 (0.07, 0.22)           |
| <b>% iAs<sup>b</sup></b>                   |    |                      |                      |                             |                             |
| < 8.5                                      | 23 | 0.35 (0.21, 0.63)    | 0.33 (0.15, 0.50)    | 0.14 (0.09, 0.18)           | 0.17 (0.11, 0.28)           |
| ≥ 8.5                                      | 23 | 0.32 (0.14, 0.57)    | 0.28 (0.10, 0.58)    | 0.10 (0.04, 0.17)           | 0.11 (0.08, 0.19)           |
| <b>% MAA<sup>b</sup></b>                   |    |                      |                      |                             |                             |
| < 14.4                                     | 23 | 0.39 (0.20, 0.68)    | 0.37 (0.17, 0.59)    | 0.15 (0.11, 0.19)           | 0.16 (0.11, 0.21)           |
| ≥ 14.4                                     | 23 | 0.31 (0.15, 0.50)    | 0.25 (0.11, 0.38)    | 0.08 (0.04, 0.14)           | 0.11 (0.06, 0.26)           |
| <b>% DMA<sup>b</sup></b>                   |    |                      |                      |                             |                             |
| < 78.3                                     | 23 | 0.28 (0.14, 0.45)    | 0.25 (0.10, 0.39)    | 0.10 (0.05, 0.15)           | 0.11 (0.07, 0.24)           |
| ≥ 78.3                                     | 23 | 0.39 (0.28, 0.73)    | 0.37 (0.19, 0.56)    | 0.14 (0.09, 0.19)           | 0.16 (0.11, 0.23)           |
| <b>Cadmium, µg/g</b>                       |    |                      |                      |                             |                             |
| <0.87                                      | 24 | 0.25 (0.12, 0.47)    | 0.30 (0.16, 0.55)    | 0.11 (0.06, 0.16)           | 0.13 (0.08, 0.21)           |
| ≥0.87                                      | 24 | 0.39 (0.29, 0.70)    | 0.35 (0.13, 0.55)    | 0.13 (0.08, 0.17)           | 0.16 (0.09, 0.26)           |
| <b>Antimony, µg/g</b>                      |    |                      |                      |                             |                             |
| <0.27                                      | 24 | 0.29 (0.16, 0.40)    | 0.24 (0.10, 0.38)    | 0.13 (0.09, 0.15)           | 0.15 (0.08, 0.21)           |
| ≥0.27                                      | 24 | 0.43 (0.13, 0.68)    | 0.38 (0.24, 0.59)    | 0.10 (0.05, 0.21)           | 0.15 (0.09, 0.25)           |
| <b>Tungsten, µg/g</b>                      |    |                      |                      |                             |                             |
| <0.13                                      | 24 | 0.32 (0.12, 0.44)    | 0.32 (0.19, 0.48)    | 0.12 (0.05, 0.15)           | 0.14 (0.09, 0.18)           |
| ≥0.13                                      | 24 | 0.36 (0.17, 0.79)    | 0.31 (0.13, 0.59)    | 0.13 (0.08, 0.18)           | 0.20 (0.09, 0.28)           |

Abbreviations: IQR, interquartile range; %iAs, Percentage of inorganic arsenic over the sum of inorganic and methylated arsenic species; %MMA, percentage of monomethylarsonate over the sum of inorganic and methylated arsenic species; %DMA, percentage of dimethylarsinate over the sum of inorganic and methylated arsenic species.

<sup>a</sup>Levels of 5-mC or 5-hmC in DNA of all biological samples were measured as the amount of methylated or hydroxymethylated cytosines relative to the cytosine genomic content (%). The median (interquartile range) level for global DNA methylation and global DNA hydroxymethylation, relative to the total DNA content was 0.13 (0.06, 0.24) % of 5-mC and 0.05 (0.03, 0.07) % of 5-hmC in visit 1 and 0.13 (0.05, 0.23) % of 5-mC and 0.06 (0.04, 0.09) % of 5-hmC in visit 3. <sup>b</sup>For BMI, Waist circumference, %body fat, and arsenic species the total size do not sum 48 because of missing data. <sup>c</sup>Sum of inorganic and methylated arsenic species in urine.

**Figure S1.** Relationship of global DNA methylation (% 5-mC) and participant characteristics in the SHS (Lee et al. 1990; North et al. 2003) in 1989-1991 (visit 1) and 1998-1999 (visit 3).

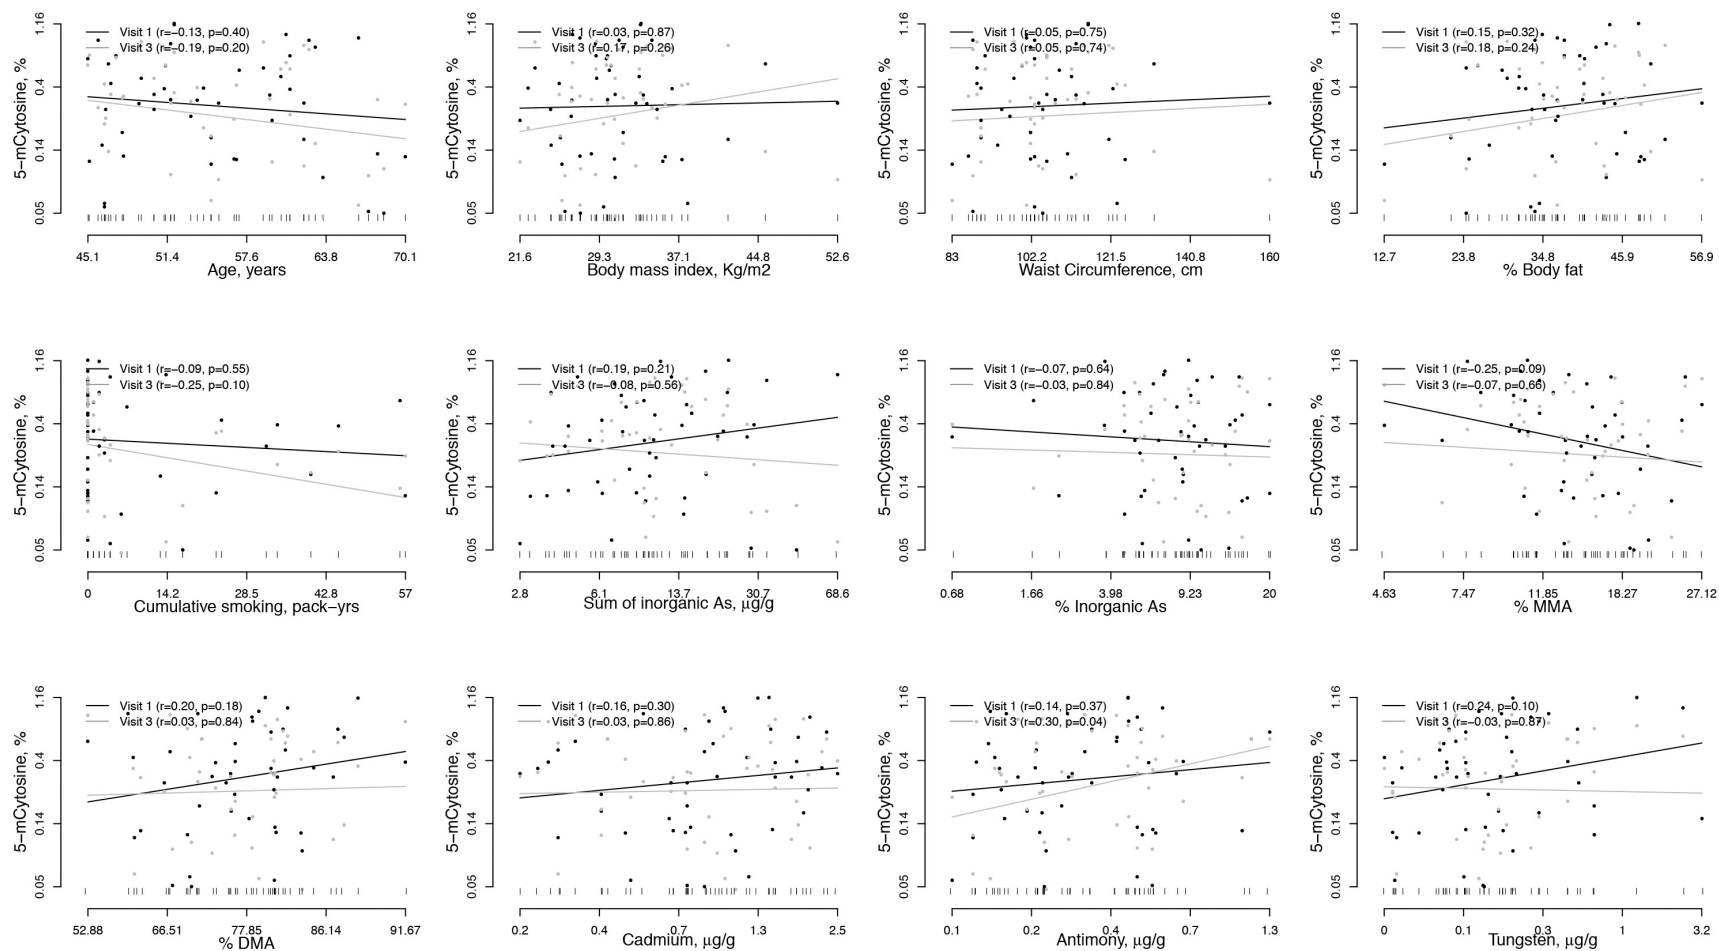

**Figure S2.** Relationship of global DNA hydroxymethylation (% 5-hmC) and participant characteristics in the SHS (Lee et al. 1990; North et al. 2003) in 1989-1991 (visit 1) and 1998-1999 (visit 3).

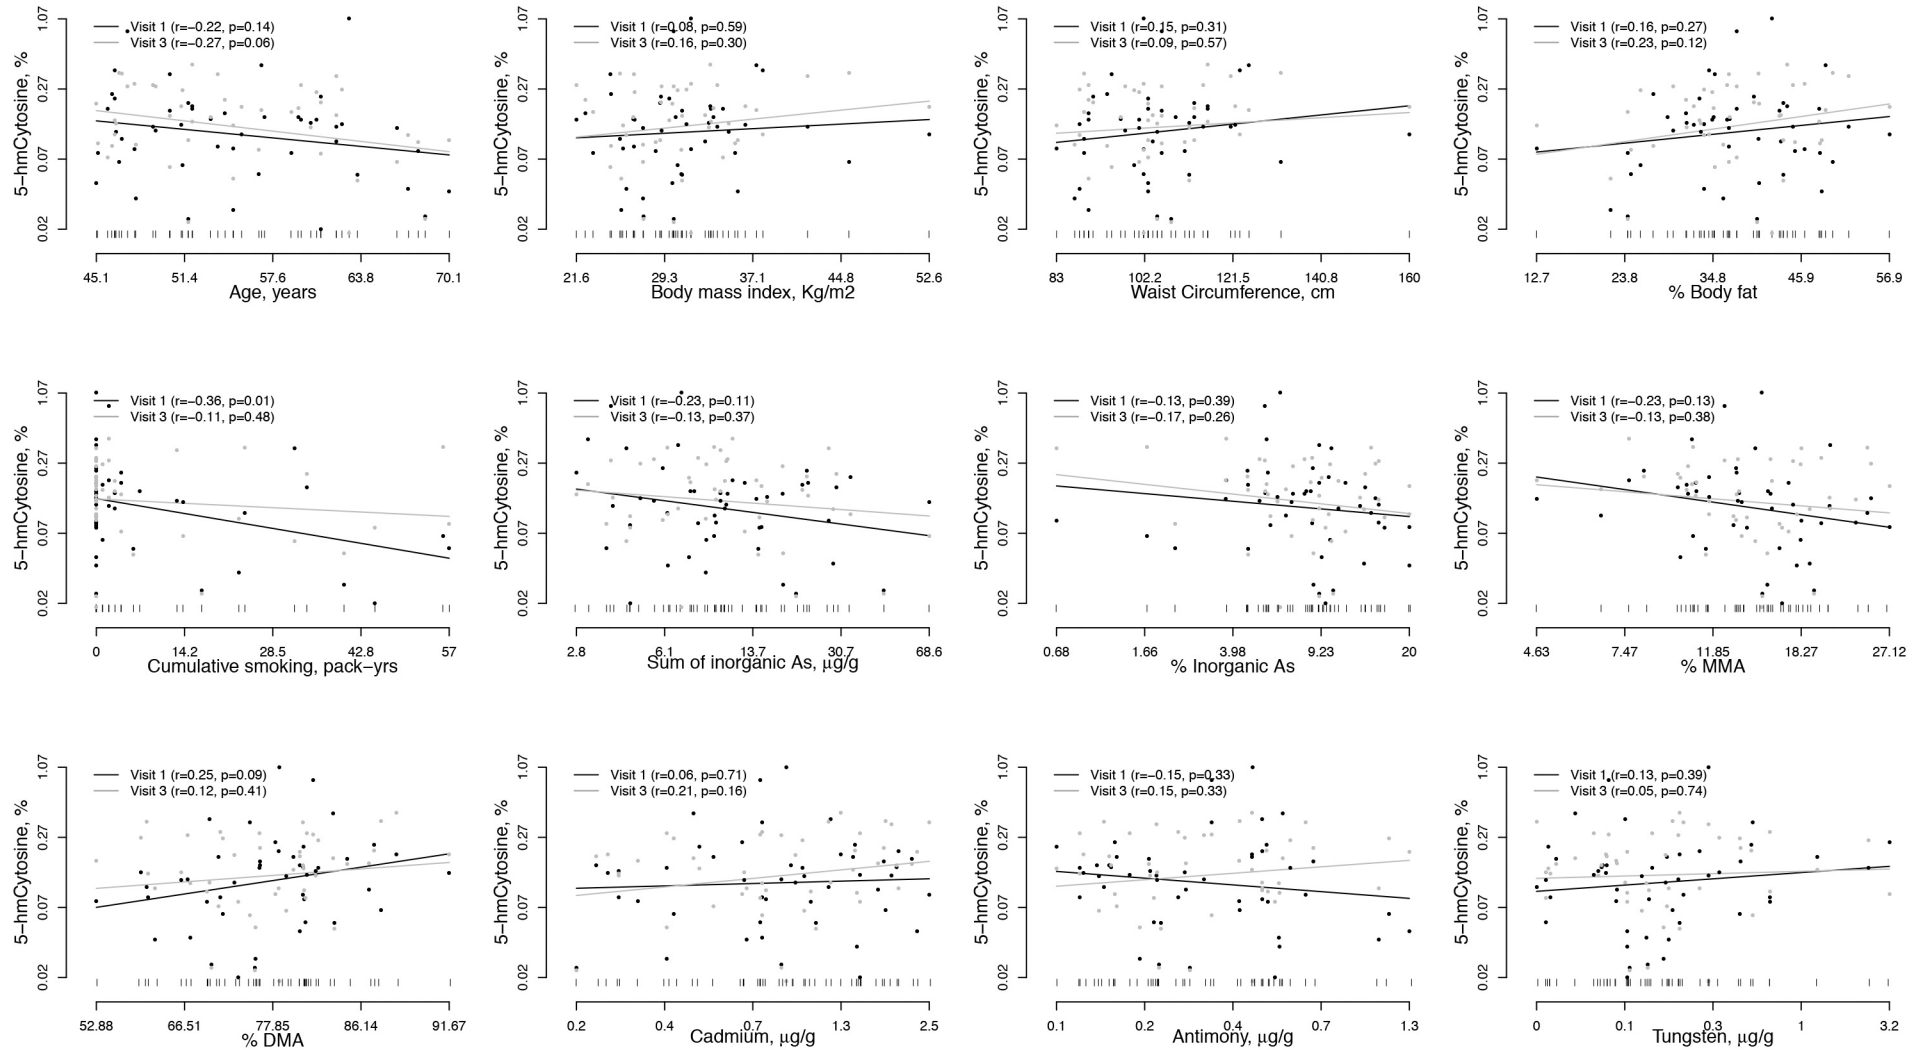

**Figure S3.** Relationship of global DNA methylation (% 5-mC) and global DNA hydroxymethylation (% 5-hmC,) in blood collected in 2010, Aragon Workers Health Study (Casasnovas et al. 2012).

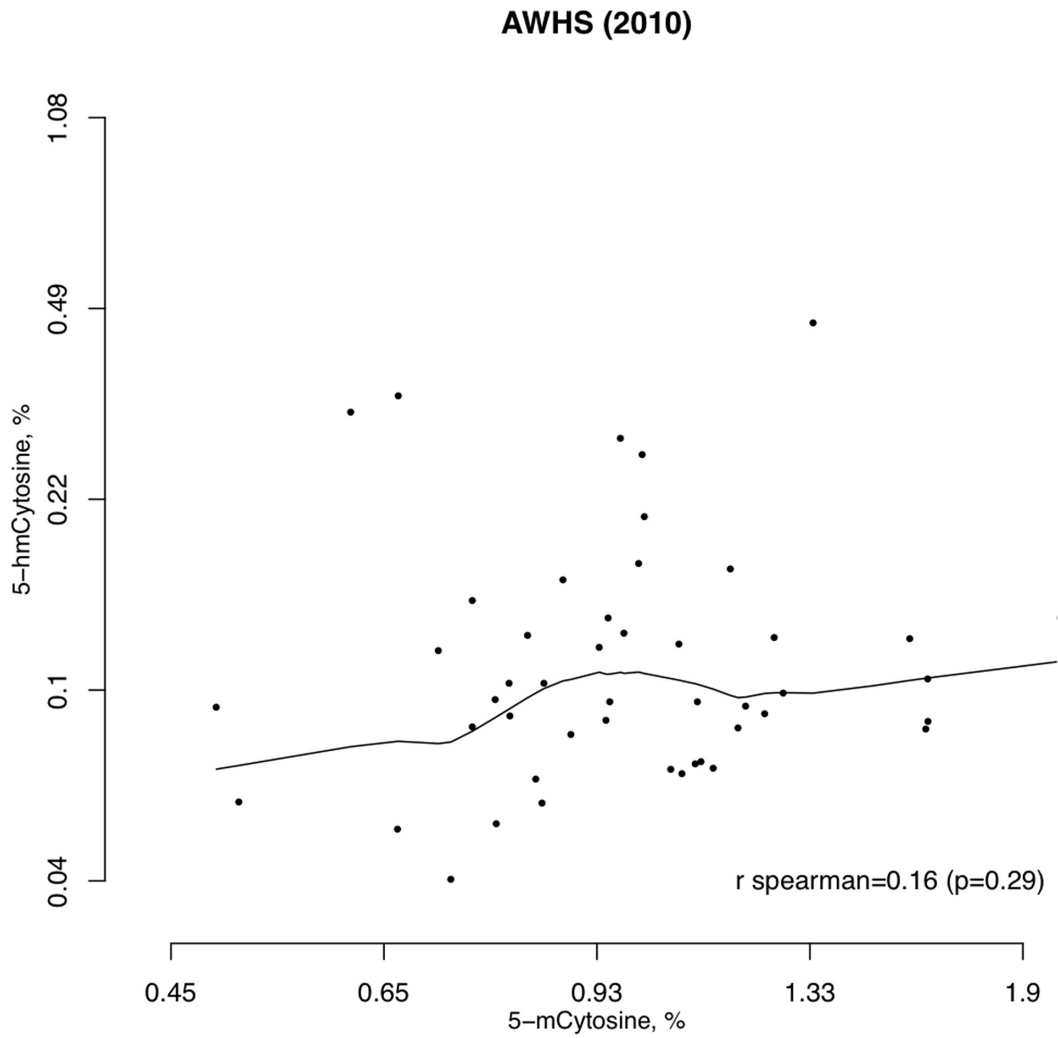



## References

- Casasnovas JA, Alcaide V, Civeira F, Guallar E, Ibanez B, Borreguero JJ, et al. 2012. Aragon Workers' Health Study--design and cohort description. *BMC cardiovascular disorders* 12:45.
- Lee ET, Welty TK, Fabsitz R, Cowan LD, Le NA, Oopik AJ, et al. 1990. The Strong Heart Study. A study of cardiovascular disease in American Indians: Design and methods. *American journal of epidemiology* 132:1141-1155.
- North KE, Howard BV, Welty TK, Best LG, Lee ET, Yeh JL, et al. 2003. Genetic and environmental contributions to cardiovascular disease risk in American Indians: The Strong Heart Family Study. *American journal of epidemiology* 157:303-314.
